# Supplementary material
Source: Springer Nature journal article supplement (https://www.springerprofessional.de/resource/supplementary/13638_2012_507_MOESM1_ESM.pdf/11897732)

Antenna port 1

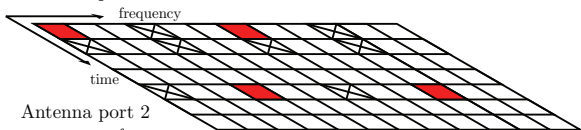

Antenna port 2

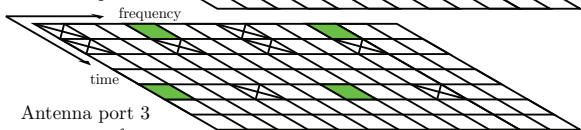

Antenna port 3

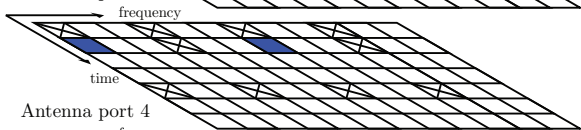

Antenna port 4

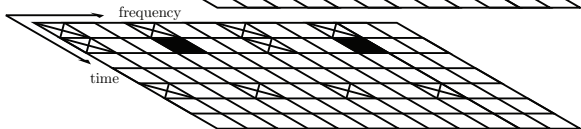

Supplement: MOESM1 [file 11897732]
